# Supplementary material
Source: Springer Nature journal article supplement (https://www.springermedizin.de/resource/supplementary/12950_2010_169_MOESM3_ESM.pdf/9558120)

### A: Total Cells-Acute Experiments

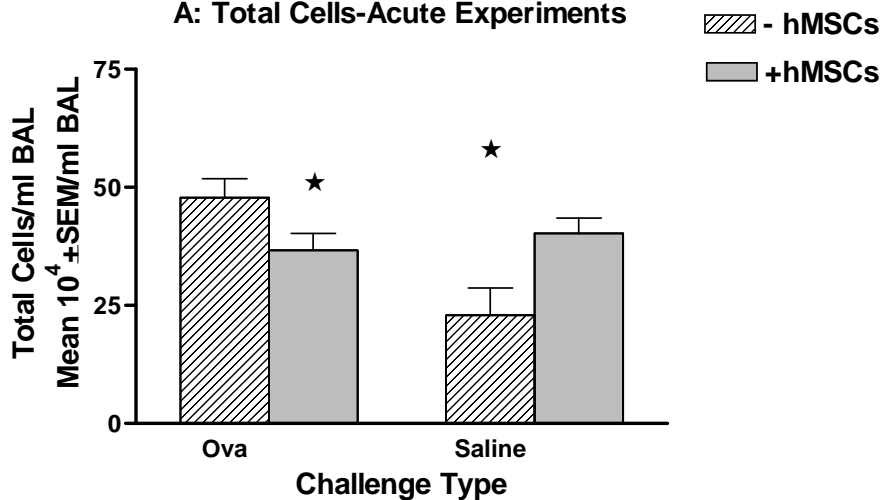

### B: Differential

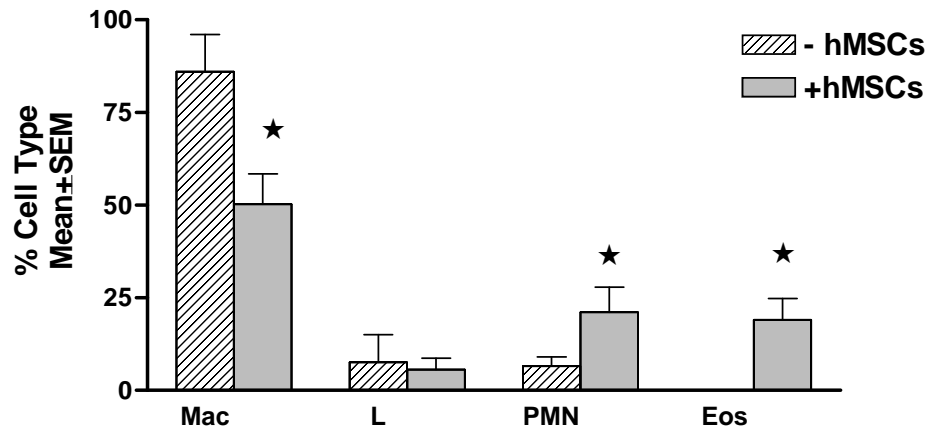

C:40X

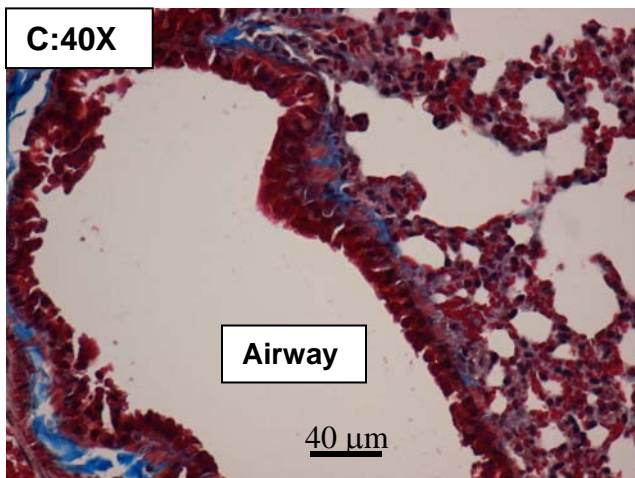

D:hMSCs 40X

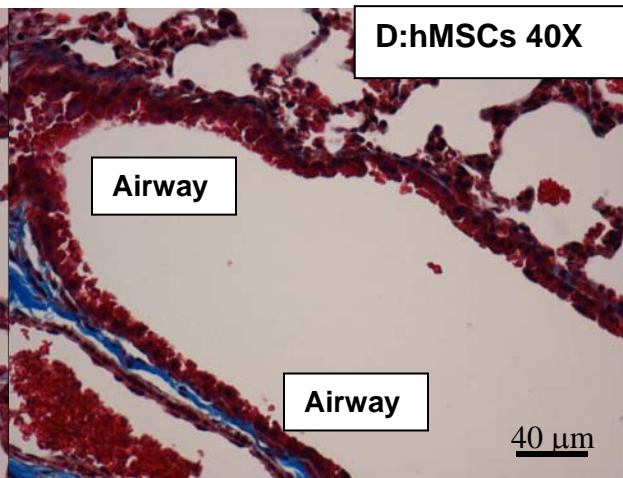

Supplement: MOESM3 [file 9558120]
